# Supplementary material for: Mitochondrial abnormalities in spinal and bulbar muscular atrophy
Source: PubMed Central journal article supplement — Hum Mol Genet. 2008 Sep 29;18(1):27–42. doi: 10.1093/hmg/ddn310 (PMC2644643; doi:10.1093/hmg/ddn310), 2008-09-29

**Supplemental Table 1: Primer sequences for qRT-PCR**

| GENE          | FORWARD                   | REVERSE                  | REF. |
|---------------|---------------------------|--------------------------|------|
| PGC1 $\alpha$ | TTGCTAGCGGTCCTCACAGA      | GGCTCTTCTGCCTCCTGA       | (27) |
| PGC1 $\beta$  | CGCTCCAGGAGACTGAATCCAG    | CTTGACTACTGTCTGTGAGGC    | (54) |
| Tfam          | CCAAAAAGACCTCGTTCAGC      | ATGTCTCCGGATCGTTTCAC     | (82) |
| PPAR $\gamma$ | GGAAGACCACTCGCATTCTT      | TCGCACTTTGGTATTCTTGGAG   | (83) |
| Nrf2          | TTCCTCTGCTGCCATTAGTCAGTC  | GCTCTTCCATTTCCGAGTCACTG  | (84) |
| NQO1          | TTCTCTGGCCGATTTCAGAGT     | GGCTGCTTGGAGCAAATG       | (85) |
| ND1           | CCTTCGACCTGACCTGACAGAAGGA | GATGCTCGGATCCATAGGAA     | (82) |
| ND5           | GCTCTACCTCACCATCTCTTGC    | TCCAGTATGCTTACCTTGTTACG  | (82) |
| COX I         | GGTCAACCAGGTGCACTTTT      | TGGGGCTCCGATTATTAGTG     | (82) |
| COX II        | TGAAGACGTCCTCCACTCATGA    | GCCTGGGATGGCATCAGTT      | (83) |
| COX III       | GCAGGATTCTTCTGAGCGTTCT    | GTCAGCAGCCTCCTAGATCATGT  | (83) |
| SOD1          | CAGGACCTCATTTTAATCCTCAC   | CCCAGGTCTCCAACATGC       | (85) |
| SOD2          | CACAAGCACAGCCTCCAG        | CGCGTTAATGTGTGGCTCC      | (70) |
| Catalase      | CAGCGACCAGATGAAGCA        | CTCCGGTGGTCAGGACAT       | (85) |
| Gpx-1         | ACAGTCCACCGTGTATGCCTTC    | CTCTTCATTCTTGCCATTCTCCTG | (85) |
| HO-1          | GGTCAGGTGTCCAGAGAAGG      | CTCCAGGGCCGTGTAGATA      | (85) |
| S18           | GTTGGTGGAGCGATTTGTCTGG    | AGGGCAGGGACTTAATCAACGC   | (82) |

82. Noack, H., Bednarek, T., Heidler, J., Ladig, R., Holtz, J. and Szibor, M. (2006)  
TFAM-dependent and independent dynamics of mtDNA levels in C2C12 myoblasts caused by redox stress. *Biochim. Biophys. Acta*, **1760**, 141-150.
83. Uldry, M., Yang, W., St-Pierre, J., Lin, J., Seale, P. and Spiegelman, B.M. (2006)  
Complementary action of the PGC-1 coactivators in mitochondrial biogenesis and brown fat differentiation. *Cell Metab.*, **3**, 333-341.
84. Pehar, M., Vargas, M.R., Robinson, K.M., Cassina, P., Diaz-Amarilla, P.J., Hagen, T.M., Radi, R., Barbeito, L. and Beckman, J.S. (2007) Mitochondrial

superoxide production and nuclear factor erythroid 2-related factor 2 activation in p75 neurotrophin receptor-induced motor neuron apoptosis. *J. Neurosci.*, **27**, 7777-7785.

85. Panee, J., Liu, W., Nakamura, K. and Berry, M.J. (2007) The responses of HT22 cells to the blockade of mitochondrial complexes and potential protective effect of selenium supplementation. *Int. J. Biol. Sci.*, **3**, 335-341.

**SUPPLEMENTAL FIGURE 1: Staurosporine increases cell death in MN-1 cells**

Staurosporine (STS), an apoptotic inducer was used as a positive control for caspase 3 activity in the fluorometric assay (for Fig. 1C). Parental MN-1 cells were exposed to vehicle control or STS and treated with the pan-caspase inhibitor, z-VAD. STS resulted in a 5-fold increase in caspase 3 activity that was blocked with z-VAD.

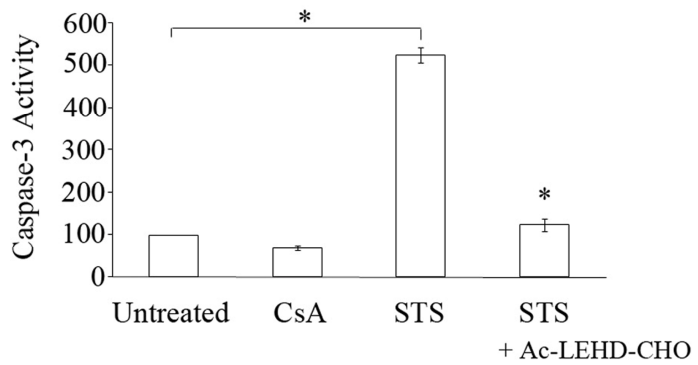

**SUPPLEMENTAL FIGURE 2: Reduced SOD2 protein in MN-1 cells and mouse**

**tissues**

AR-24Q and AR-65Q MN-1 cells (A) were either exposed to vehicle control or R1881 for 48 h. The cells were immunostained for SOD2 (FITC labeled; green), and Hsp60 (Texas-red labeled; red) with the nucleus counterstained with DAPI (blue). The images show decreased levels of SOD2 and Hsp60 in the AR-65Q MN-1 cells. (B-C) Representative immunoblots of 3-month old mouse muscle (B) and spinal cord (C) show decreased levels of SOD2. The densitometric quantitation is shown in the histograms (N = 5 for each genotype per tissue). The error bars indicate SEM; \* $p \leq 0.05$ .

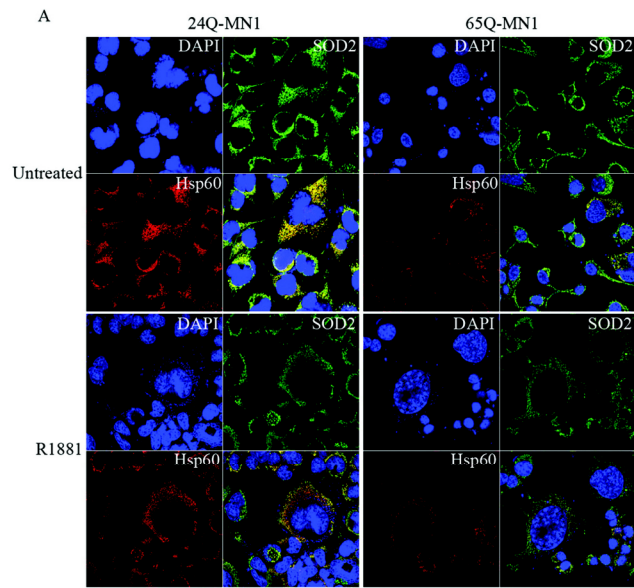

**B** Muscle at manifesting stage      **C** Spinal cord at manifesting stage

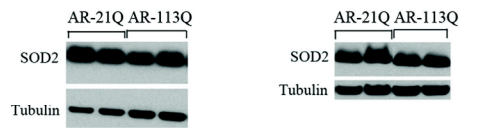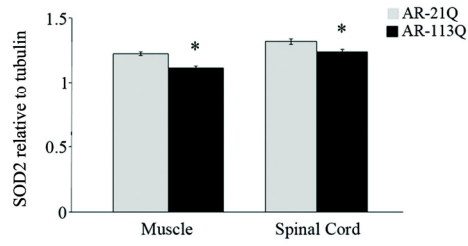

Supplement: ddn310_1.pdf [file ddn310_1.pdf]
